# Supplementary material
Source: PubMed Central journal article supplement (PMC7308624)
Supplement: nxz240_supplemental_file.pdf [file nxz240_supplemental_file.pdf]

# Circulating Very-Long Chain Saturated Fatty Acid Levels are Inversely Associated with Incident Type 2 Diabetes in U.S. Men and Women

Andres V. Ardisson Korat  
Online Supplementary Material

**Supplemental table 1. Baseline characteristics of 1,392 women in the Nurses' Health Study (1990) according to quartiles of plasma fatty acids of VLCSCFA<sup>1</sup>**

|                                    | Quartiles of 20:0 |             |             |             |
|------------------------------------|-------------------|-------------|-------------|-------------|
|                                    | Q1                | Q2          | Q3          | Q4          |
| Plasma 20:0                        | 0.14 ± 0.02       | 0.18 ± 0.01 | 0.22 ± 0.01 | 0.27 ± 0.03 |
| Age, years                         | 60.5 ± 6.1        | 61.1 ± 6.1  | 60.4 ± 6.3  | 59.3 ± 6.9  |
| Race, Caucasian (%)                | 99.7              | 99.2        | 98.9        | 99.4        |
| BMI (kg/m <sup>2</sup> )           | 26.1 ± 4.7        | 25.4 ± 4.4  | 24.9 ± 4.5  | 24.6 ± 3.8  |
| Current smoker (%)                 | 16.5              | 17.4        | 19.6        | 19.9        |
| Physical activity, MET, hours/week | 14.1 ± 18.1       | 18.2 ± 22.2 | 16.2 ± 17.9 | 16.6 ± 18.4 |
| Hypertension (%)                   | 33.7              | 21.7        | 18.1        | 14.8        |
| Hypercholesterolemia (%)           | 40.9              | 39.9        | 34.3        | 27.3        |
| Family history of diabetes (%)     | 31.0              | 26.8        | 23.0        | 26.4        |
| Total energy (kcal/day)            | 1715 ± 462        | 1797 ± 503  | 1788 ± 532  | 1760 ± 492  |
| AHEI                               | 47.8 ± 9.7        | 49.1 ± 10.5 | 48.5 ± 10.1 | 49.0 ± 10.7 |
| Peanuts (g/day)                    | 2.2 ± 4.3         | 2.2 ± 4.3   | 2.2 ± 4.8   | 2.2 ± 6.5   |
| Peanut butter (g/day)              | 4.0 ± 9.1         | 4.0 ± 9.2   | 4.1 ± 8.9   | 4.2 ± 8.9   |
| Coffee (ml/day)                    | 308 ± 335         | 354 ± 338   | 401 ± 399   | 403 ± 400   |
| Alcohol (g/day)                    | 5.7 ± 10.3        | 5.5 ± 10.1  | 5.6 ± 9.3   | 3.8 ± 6.0   |
| Vegetable fat (g/day)              | 27.4 ± 11.5       | 29.3 ± 13.5 | 28.9 ± 12.8 | 30.0 ± 14.3 |
| Dairy fat (g/day)                  | 10.9 ± 6.2        | 11.1 ± 6.5  | 12.3 ± 7.8  | 12.2 ± 7.6  |

|                                    | Quartiles of 22:0 |             |             |             |
|------------------------------------|-------------------|-------------|-------------|-------------|
|                                    | Q1                | Q2          | Q3          | Q4          |
| Plasma 22:0                        | 0.32 ± 0.07       | 0.46 ± 0.03 | 0.57 ± 0.04 | 0.76 ± 0.10 |
| Age, years                         | 60.6 ± 6.3        | 60.8 ± 5.8  | 60.4 ± 6.6  | 59.5 ± 6.7  |
| Race, Caucasian (%)                | 99.2              | 100         | 98.8        | 99.0        |
| BMI (kg/m <sup>2</sup> )           | 26.3 ± 5.2        | 24.9 ± 4.1  | 25.1 ± 4.2  | 24.8 ± 3.9  |
| Current smoker (%)                 | 17.1              | 18.9        | 17.6        | 19.6        |
| Physical activity, MET, hours/week | 15.4 ± 20.2       | 16.8 ± 19.8 | 16.2 ± 18.2 | 16.6 ± 18.7 |
| Hypertension (%)                   | 32.6              | 22.7        | 16.1        | 17.3        |
| Hypercholesterolemia (%)           | 39.7              | 36.8        | 34.0        | 32.6        |
| Family history of diabetes (%)     | 31.3              | 26.5        | 23.8        | 25.6        |
| Total energy (kcal/day)            | 1746 ± 491        | 1774 ± 504  | 1805 ± 480  | 1730 ± 515  |
| AHEI                               | 48.5 ± 10.3       | 48.4 ± 10.3 | 48.7 ± 10.2 | 39.1 ± 9.9  |
| Peanuts (g/day)                    | 2.0 ± 4.3         | 2.2 ± 4.3   | 2.2 ± 4.3   | 2.8 ± 8.8   |
| Peanut butter (g/day)              | 3.5 ± 10.1        | 4.0 ± 10.2  | 4.2 ± 9.9   | 4.8 ± 10.9  |
| Coffee (ml/day)                    | 331 ± 358         | 354 ± 360   | 402 ± 380   | 422 ± 398   |
| Alcohol (g/day)                    | 6.9 ± 12.8        | 5.6 ± 9.6   | 5.1 ± 9.1   | 4.1 ± 7.5   |
| Vegetable fat (g/day)              | 27.2 ± 12.1       | 27.9 ± 12.3 | 29.9 ± 12.6 | 29.7 ± 14.9 |

**Supplementary data**

|                   |            |            |            |            |
|-------------------|------------|------------|------------|------------|
| Dairy fat (g/day) | 10.8 ± 6.0 | 12.0 ± 7.2 | 11.9 ± 7.5 | 11.7 ± 7.4 |
|-------------------|------------|------------|------------|------------|

|                                    | <b>Quartiles of 24:0</b> |             |             |             |
|------------------------------------|--------------------------|-------------|-------------|-------------|
|                                    | <b>Q1</b>                | <b>Q2</b>   | <b>Q3</b>   | <b>Q4</b>   |
| Plasma 24:0                        | 0.22 ± 0.05              | 0.34 ± 0.03 | 0.44 ± 0.03 | 0.62 ± 0.10 |
| Age, years                         | 60.4 ± 6.4               | 60.9 ± 5.9  | 60.1 ± 6.6  | 59.9 ± 6.7  |
| Race, Caucasian (%)                | 99.5                     | 99.4        | 99.1        | 99.1        |
| BMI (kg/m <sup>2</sup> )           | 26.4 ± 4.9               | 25.2 ± 4.5  | 25.0 ± 4.2  | 24.4 ± 3.7  |
| Current smoker (%)                 | 14.9                     | 21.1        | 20.4        | 16.9        |
| Physical activity, MET, hours/week | 14.7 ± 19.9              | 16.3 ± 19.3 | 17.2 ± 19.2 | 17.0 ± 18.4 |
| Hypertension (%)                   | 30.6                     | 22.5        | 18.6        | 16.9        |
| Hypercholesterolemia (%)           | 38.4                     | 37.3        | 34.0        | 33.4        |
| Family history of diabetes (%)     | 30.6                     | 26.2        | 24.0        | 26.3        |
| Total energy (kcal/day)            | 1765 ± 470               | 1757 ± 523  | 1788 ± 485  | 1746 ± 515  |
| AHEI                               | 48.0 ± 10.3              | 48.8 ± 9.8  | 48.4 ± 10.4 | 49.4 ± 10.3 |
| Peanuts (g/day)                    | 2.0 ± 4.2                | 2.0 ± 0.20  | 2.6 ± 4.4   | 2.8 ± 8.8   |
| Peanut butter (g/day)              | 3.2 ± 10.9               | 3.6 ± 11.2  | 4.3 ± 10.4  | 4.5 ± 8.9   |
| Coffee (ml/day)                    | 307 ± 349                | 346 ± 352   | 402 ± 375   | 425 ± 405   |
| Alcohol (g/day)                    | 5.5 ± 11.1               | 5.5 ± 10.2  | 6.0 ± 10.2  | 5.1 ± 8.4   |
| Vegetable fat (g/day)              | 28.0 ± 12.2              | 27.2 ± 12.3 | 29.8 ± 12.7 | 29.6 ± 14.7 |
| Dairy fat (g/day)                  | 11.1 ± 6.0               | 11.7 ± 7.0  | 11.9 ± 7.8  | 11.7 ± 7.3  |

|                                    | <b>Quartiles of 20:0+22:0+24:0</b> |             |             |             |
|------------------------------------|------------------------------------|-------------|-------------|-------------|
|                                    | <b>Q1</b>                          | <b>Q2</b>   | <b>Q3</b>   | <b>Q4</b>   |
| Plasma 20:0+22:0+24:0              | 0.70 ± 0.14                        | 1.00 ± 0.06 | 1.22 ± 0.08 | 1.63 ± 0.20 |
| Age, years                         | 60.5 ± 6.4                         | 61.0 ± 5.8  | 60.2 ± 6.6  | 59.7 ± 6.7  |
| Race, Caucasian (%)                | 99.5                               | 99.7        | 99.1        | 98.8        |
| BMI (kg/m <sup>2</sup> )           | 26.3 ± 4.9                         | 25.0 ± 4.4  | 25.1 ± 4.3  | 24.6 ± 3.8  |
| Current smoker (%)                 | 16.3                               | 18.7        | 19.8        | 18.4        |
| Physical activity, MET, hours/week | 14.5 ± 19.6                        | 17.1 ± 19.7 | 16.7 ± 19.0 | 16.8 ± 18.7 |
| Hypertension (%)                   | 31.3                               | 22.8        | 17.6        | 16.9        |
| Hypercholesterolemia (%)           | 39.3                               | 39.3        | 31          | 33.1        |
| Family history of diabetes (%)     | 31.3                               | 25.2        | 24.3        | 26.3        |
| Total energy (kcal/day)            | 1763 ± 479                         | 1744 ± 506  | 1804 ± 489  | 1748 ± 518  |
| AHEI                               | 47.9 ± 10.2                        | 48.9 ± 10.1 | 48.6 ± 10.5 | 49.2 ± 10.1 |
| Peanuts (g/day)                    | 2.0 ± 4.3                          | 2.0 ± 5.7   | 2.6 ± 4.4   | 2.8 ± 5.7   |
| Peanut butter (g/day)              | 3.2 ± 11.9                         | 3.7 ± 10.9  | 4.1 ± 10.8  | 4.4 ± 10.9  |
| Coffee (ml/day)                    | 329 ± 350                          | 332 ± 351   | 427 ± 378   | 422 ± 424   |
| Alcohol (g/day)                    | 6.2 ± 12.3                         | 5.4 ± 9.4   | 5.9 ± 10.1  | 4.4 ± 7.7   |
| Vegetable fat (g/day)              | 27.7 ± 12.0                        | 27.4 ± 12.1 | 29.7 ± 12.7 | 29.9 ± 15.1 |

### Supplementary data

|                   |            |            |            |            |
|-------------------|------------|------------|------------|------------|
| Dairy fat (g/day) | 11.0 ± 5.9 | 11.6 ± 7.3 | 12.0 ± 7.6 | 11.8 ± 7.3 |
|-------------------|------------|------------|------------|------------|

<sup>1</sup> Values are mean and ± SD for continuous variables and percent for categorical variables.

Abbreviations: AHEI, Alternative Healthy Eating Index; BMI, body mass index; HPFS, Health Professionals Follow-up Study; NHL, METs, metabolic equivalent; NHS, Nurses' Health Study.

**Supplemental table 2. Baseline characteristics of 1,462 men in the Health Professionals Follow-Up Study (1994) according to quartiles of plasma fatty acids of VLCSCFA<sup>1</sup>**

|                                    | Quartiles of 20:0 |             |             |             |
|------------------------------------|-------------------|-------------|-------------|-------------|
|                                    | Q1                | Q2          | Q3          | Q4          |
| Plasma 20:0                        | 0.12 ± 0.02       | 0.17 ± 0.01 | 0.20 ± 0.01 | 0.25 ± 0.03 |
| Age, years                         | 66.1 ± 8.3        | 64.9 ± 8.6  | 63.2 ± 8.7  | 63.2 ± 8.8  |
| Race, Caucasian (%)                | 94.6              | 93.1        | 91.7        | 94.7        |
| BMI (kg/m <sup>2</sup> )           | 26.3 ± 3.3        | 25.6 ± 3.3  | 25.4 ± 3.0  | 25.5 ± 3.0  |
| Current smoker (%)                 | 8.5               | 5.9         | 7.0         | 9.9         |
| Physical activity, MET, hours/week | 35.8 ± 42.2       | 37.3 ± 40.7 | 36.2 ± 36.9 | 34.9 ± 32.5 |
| Hypertension (%)                   | 30.1              | 26.9        | 22.9        | 17.1        |
| Hypercholesterolemia (%)           | 32.5              | 23.8        | 25.5        | 23.4        |
| Family history of diabetes (%)     | 25.7              | 21.8        | 23.0        | 19.4        |
| Total energy (kcal/day)            | 2054 ± 598        | 2010 ± 598  | 2033 ± 633  | 2075 ± 595  |
| AHEI                               | 48.7 ± 10.3       | 47.9 ± 10.2 | 48.5 ± 10.4 | 47.7 ± 10.1 |
| Peanuts (g/day)                    | 5.2 ± 11.9        | 4.8 ± 9.9   | 4.6 ± 10.2  | 5.0 ± 10.1  |
| Peanut butter (g/day)              | 1.8 ± 6.9         | 2.6 ± 7.2   | 1.8 ± 6.4   | 3.5 ± 6.3   |
| Coffee (ml/day)                    | 472 ± 370         | 450 ± 422   | 471 ± 425   | 498 ± 401   |
| Alcohol (g/day)                    | 14.2 ± 18.9       | 11.3 ± 15.2 | 10.9 ± 14.0 | 9.5 ± 12.2  |
| Vegetable fat (g/day)              | 33.3 ± 16.7       | 31.7 ± 14.7 | 33.1 ± 16.5 | 35.7 ± 17.3 |
| Dairy fat (g/day)                  | 11.0 ± 8.3        | 11.0 ± 8.6  | 11.4 ± 7.9  | 12.4 ± 9.4  |

|                                    | Quartiles of 22:0 |             |             |             |
|------------------------------------|-------------------|-------------|-------------|-------------|
|                                    | Q1                | Q2          | Q3          | Q4          |
| Plasma 22:0                        | 0.27 ± 0.07       | 0.42 ± 0.04 | 0.55 ± 0.03 | 0.73 ± 0.10 |
| Age, years                         | 66.5 ± 8.3        | 64.4 ± 8.4  | 63.4 ± 8.6  | 62.9 ± 8.7  |
| Race, Caucasian (%)                | 93.6              | 94.5        | 92.8        | 93.4        |
| BMI (kg/m <sup>2</sup> )           | 26.3 ± 3.4        | 25.6 ± 3.1  | 25.6 ± 3.1  | 25.4 ± 3.0  |
| Current smoker (%)                 | 7.5               | 8.3         | 8.2         | 7.3         |
| Physical activity, MET, hours/week | 33.5 ± 36.9       | 37.0 ± 42.3 | 36.0 ± 38.0 | 38.9 ± 38.0 |
| Hypertension (%)                   | 32.3              | 24.0        | 23.5        | 16.6        |
| Hypercholesterolemia (%)           | 32.3              | 21.1        | 29.5        | 22.5        |
| Family history of diabetes (%)     | 24.2              | 21.3        | 25.2        | 20.3        |
| Total energy (kcal/day)            | 2041 ± 619        | 2047 ± 621  | 2015 ± 579  | 2073 ± 590  |
| AHEI                               | 47.9 ± 10.3       | 49.7 ± 10.9 | 48.7 ± 9.6  | 46.5 ± 9.7  |
| Peanuts (g/day)                    | 4.6 ± 10.9        | 5.1 ± 9.9   | 5.1 ± 10.1  | 5.1 ± 10.2  |
| Peanut butter (g/day)              | 2.9 ± 8.1         | 2.8 ± 9.2   | 2.8 ± 9.4   | 3.5 ± 7.4   |
| Coffee (ml/day)                    | 448 ± 401         | 447 ± 405   | 469 ± 423   | 496 ± 421   |
| Alcohol (g/day)                    | 13.4 ± 18.5       | 12.1 ± 16.2 | 10.9 ± 13.2 | 9.6 ± 12.9  |
| Vegetable fat (g/day)              | 32.1 ± 16.1       | 33.3 ± 17.3 | 33.1 ± 15.8 | 35.8 ± 16.0 |

**Supplementary data**

|                   |            |            |            |            |
|-------------------|------------|------------|------------|------------|
| Dairy fat (g/day) | 10.8 ± 7.8 | 11.4 ± 9.6 | 11.0 ± 7.7 | 12.5 ± 8.9 |
|-------------------|------------|------------|------------|------------|

|                                    | Quartiles of 24:0 |             |             |             |
|------------------------------------|-------------------|-------------|-------------|-------------|
|                                    | Q1                | Q2          | Q3          | Q4          |
| Plasma 24:0                        | 0.22 ± 0.05       | 0.35 ± 0.03 | 0.46 ± 0.03 | 0.62 ± 0.09 |
| Age, years                         | 66.6 ± 8.2        | 64.7 ± 8.5  | 63.0 ± 8.7  | 62.5 ± 8.6  |
| Race, Caucasian (%)                | 92.3              | 95.3        | 92.3        | 94.2        |
| BMI (kg/m <sup>2</sup> )           | 26.3 ± 3.3        | 25.7 ± 3.2  | 25.6 ± 3.2  | 25.3 ± 3.0  |
| Current smoker (%)                 | 8.0               | 6.4         | 9.6         | 7.2         |
| Physical activity, MET, hours/week | 32.6 ± 37.6       | 38.6 ± 42.4 | 34.9 ± 37.4 | 40.4 ± 37.5 |
| Hypertension (%)                   | 33.1              | 22.8        | 22.4        | 16.3        |
| Hypercholesterolemia (%)           | 30.2              | 25.1        | 24.9        | 16.3        |
| Family history of diabetes (%)     | 24.0              | 22.3        | 22.9        | 24.9        |
| Total energy (kcal/day)            | 2054 ± 617        | 2033 ± 617  | 2020 ± 592  | 2062 ± 581  |
| AHEI                               | 47.1 ± 10.2       | 50.3 ± 10.5 | 48.2 ± 9.8  | 48.0 ± 10.2 |
| Peanuts (g/day)                    | 4.9 ± 11.5        | 4.9 ± 10.9  | 4.9 ± 10.8  | 5.0 ± 9.1   |
| Peanut butter (g/day)              | 2.1 ± 8.9         | 2.7 ± 11.2  | 2.1 ± 10.4  | 3.5 ± 8.2   |
| Coffee (ml/day)                    | 446 ± 377         | 446 ± 371   | 468 ± 446   | 520 ± 425   |
| Alcohol (g/day)                    | 12.3 ± 17.6       | 12.0 ± 15.7 | 11.2 ± 14.5 | 11.3 ± 13.8 |
| Vegetable fat (g/day)              | 32.5 ± 16.0       | 33.0 ± 17.4 | 33.2 ± 15.8 | 35.6 ± 16.3 |
| Dairy fat (g/day)                  | 1.9 ± 1.6         | 1.9 ± 1.6   | 11.3 ± 8.3  | 2.2 ± 1.8   |

|                                    | Quartiles of 20:0+22:0+24:0 |             |             |             |
|------------------------------------|-----------------------------|-------------|-------------|-------------|
|                                    | Q1                          | Q2          | Q3          | Q4          |
| Plasma 20:0+22:0+24:0              | 0.63 ± 0.13                 | 0.94 ± 0.08 | 1.20 ± 0.07 | 1.57 ± 0.20 |
| Age, years                         | 66.4 ± 8.2                  | 64.8 ± 8.6  | 62.8 ± 8.5  | 63.1 ± 8.7  |
| Race, Caucasian (%)                | 94.1                        | 93.8        | 92.8        | 93.6        |
| BMI (kg/m <sup>2</sup> )           | 26.4 ± 3.3                  | 25.6 ± 3.2  | 25.5 ± 3.0  | 25.3 ± 3.0  |
| Current smoker (%)                 | 7.9                         | 7.3         | 8.2         | 7.8         |
| Physical activity, MET, hours/week | 32.8 ± 36.9                 | 38.6 ± 44.2 | 35.3 ± 36.9 | 39.3 ± 36.4 |
| Hypertension (%)                   | 33.3                        | 22.8        | 22.3        | 17.0        |
| Hypercholesterolemia (%)           | 32.7                        | 21.1        | 25.8        | 25.1        |
| Family history of diabetes (%)     | 25.2                        | 21.2        | 23.9        | 20.1        |
| Total energy (kcal/day)            | 2059 ± 623                  | 2021 ± 603  | 2016 ± 580  | 2074 ± 604  |
| AHEI                               | 47.7 ± 10.3                 | 49.7 ± 9.8  | 48.3 ± 9.6  | 47.4 ± 10.1 |
| Peanuts (g/day)                    | 4.8 ± 11.9                  | 4.9 ± 10.9  | 4.9 ± 10.8  | 5.0 ± 10.2  |
| Peanut butter (g/day)              | 2.8 ± 7.6                   | 2.6 ± 10.5  | 2.6 ± 10.2  | 3.5 ± 10.2  |
| Coffee (ml/day)                    | 448 ± 403                   | 446 ± 405   | 471 ± 451   | 519 ± 424   |
| Alcohol (g/day)                    | 13.2 ± 18.5                 | 12.1 ± 15.8 | 10.7 ± 13.3 | 10.2 ± 13.2 |
| Vegetable fat (g/day)              | 32.5 ± 16.3                 | 32.9 ± 16.9 | 33.0 ± 16.2 | 35.9 ± 15.8 |

### Supplementary data

|                   |            |            |            |            |
|-------------------|------------|------------|------------|------------|
| Dairy fat (g/day) | 11.2 ± 8.7 | 11.0 ± 8.7 | 11.0 ± 7.6 | 12.3 ± 9.1 |
|-------------------|------------|------------|------------|------------|

<sup>†</sup> **Supplemental table 3. Partial Spearman correlations between circulating plasma fatty acid biomarkers of 20:0, 22:0, and 24:0 among 708 participants in the Nurses' Health Study and 808 participants in the Health Professionals Follow-Up Study**

Values are mean and ± SD for continuous variables and percent for categorical variables.

Abbreviations: AHEI, Alternative Healthy Eating Index; BMI, body mass index; HPFS, Health Professionals Follow-up Study; METs, metabolic equivalent; NHS, Nurses' Health Study.

Supplementary data

|                      | Plasma fatty acids <sup>1</sup> |                    |                    |
|----------------------|---------------------------------|--------------------|--------------------|
|                      | 20:0                            | 22:0               | 24:0               |
| <b>NHS</b>           |                                 |                    |                    |
| 20:0                 | 1.0                             | 0.77 <sup>§</sup>  | 0.73 <sup>§</sup>  |
| 22:0                 | 0.77 <sup>§</sup>               | 1.0                | 0.92 <sup>§</sup>  |
| 24:0                 | 0.69 <sup>§</sup>               | 0.92 <sup>§</sup>  | 1.0                |
| 14:0                 | -0.42 <sup>§</sup>              | -0.48 <sup>§</sup> | -0.46 <sup>§</sup> |
| 16:0                 | -0.48 <sup>§</sup>              | -0.62 <sup>§</sup> | -0.62 <sup>§</sup> |
| 18:0                 | 0.45 <sup>§</sup>               | 0.26 <sup>§</sup>  | 0.19 <sup>§</sup>  |
| 15:0                 | -0.20 <sup>§</sup>              | -0.25 <sup>§</sup> | -0.31 <sup>§</sup> |
| 17:0                 | 0.26 <sup>§</sup>               | 0.12 <sup>§</sup>  | 0.08 <sup>†</sup>  |
| <i>trans</i> 16:1n-7 | -0.06                           | -0.12 <sup>§</sup> | -0.23 <sup>§</sup> |
| <i>trans</i> 18:1    | 0.09 <sup>†</sup>               | -0.01              | -0.17 <sup>§</sup> |
| <i>trans</i> 18:2    | 0.01                            | -0.08 <sup>‡</sup> | -0.22 <sup>§</sup> |
| 18:2                 | 0.24 <sup>§</sup>               | 0.41 <sup>§</sup>  | 0.38 <sup>§</sup>  |
| 20:4                 | 0.26 <sup>§</sup>               | 0.39 <sup>§</sup>  | 0.45 <sup>§</sup>  |
| EPA                  | 0.11 <sup>‡</sup>               | 0.11 <sup>‡</sup>  | 0.20 <sup>§</sup>  |
| DHA                  | 0.17 <sup>§</sup>               | 0.23 <sup>§</sup>  | 0.34 <sup>§</sup>  |
| <b>HPFS</b>          |                                 |                    |                    |
| 20:0                 | 1.0                             | 0.71 <sup>§</sup>  | 0.68 <sup>§</sup>  |
| 22:0                 | 0.71 <sup>§</sup>               | 1.0                | 0.89 <sup>§</sup>  |
| 24:0                 | 0.68 <sup>§</sup>               | 0.89 <sup>§</sup>  | 1.0                |
| 14:0                 | -0.39 <sup>§</sup>              | -0.49 <sup>§</sup> | -0.49 <sup>§</sup> |
| 16:0                 | -0.51 <sup>§</sup>              | -0.60 <sup>§</sup> | -0.59 <sup>§</sup> |
| 18:0                 | 0.36 <sup>§</sup>               | 0.07 <sup>†</sup>  | 0.09 <sup>†</sup>  |
| 15:0                 | -0.10 <sup>§</sup>              | -0.23 <sup>§</sup> | -0.29 <sup>§</sup> |
| 17:0                 | 0.21 <sup>§</sup>               | 0.03               | -0.03              |
| <i>trans</i> 16:1n-7 | 0.07 <sup>†</sup>               | -0.07 <sup>†</sup> | -0.10 <sup>§</sup> |
| <i>trans</i> 18:1    | <0.01                           | -0.06              | -0.13 <sup>§</sup> |
| <i>trans</i> 18:2    | -0.08 <sup>†</sup>              | -0.17 <sup>§</sup> | -0.20 <sup>§</sup> |
| 18:2                 | 0.27 <sup>§</sup>               | 0.42 <sup>§</sup>  | 0.43 <sup>§</sup>  |
| 20:4                 | 0.23 <sup>§</sup>               | 0.40 <sup>§</sup>  | 0.41 <sup>§</sup>  |
| EPA                  | 0.07                            | 0.05               | 0.14 <sup>§</sup>  |
| DHA                  | 0.16 <sup>§</sup>               | 0.15 <sup>§</sup>  | 0.24 <sup>§</sup>  |

<sup>1</sup>Fatty acid concentrations were assessed from the plasma fraction of NHS and HPFS participants.  
<sup>†</sup>p-value for correlation coefficient < 0.05; <sup>‡</sup> p-value <0.01; <sup>§</sup> p-value <0.001.

## Supplementary data

**Supplemental table 4. Partial Spearman correlations between circulating erythrocyte fatty acid biomarkers of 20:0, 22:0, and 24:0 among 669 participants in the Nurses' Health Study and 852 participants in the Health Professionals Follow-Up Study**

|                      | Erythrocyte fatty acids <sup>1</sup> |                    |                    |
|----------------------|--------------------------------------|--------------------|--------------------|
|                      | 20:0                                 | 22:0               | 24:0               |
| <b>NHS</b>           |                                      |                    |                    |
| 20:0                 | 1.0                                  | 0.53 <sup>§</sup>  | 0.32 <sup>§</sup>  |
| 22:0                 | 0.53 <sup>§</sup>                    | 1.0                | 0.83 <sup>§</sup>  |
| 24:0                 | 0.32 <sup>§</sup>                    | 0.83 <sup>§</sup>  | 1.0                |
| 14:0                 | -0.29 <sup>§</sup>                   | -0.52 <sup>§</sup> | -0.48 <sup>§</sup> |
| 16:0                 | -0.27 <sup>§</sup>                   | -0.63 <sup>§</sup> | -0.69 <sup>§</sup> |
| 18:0                 | 0.21 <sup>§</sup>                    | 0.40 <sup>§</sup>  | 0.43 <sup>§</sup>  |
| 15:0                 | -0.05                                | -0.36 <sup>§</sup> | -0.44 <sup>§</sup> |
| 17:0                 | 0.08 <sup>†</sup>                    | -0.48 <sup>§</sup> | -0.54 <sup>§</sup> |
| <i>trans</i> 16:1n-7 | -0.03                                | -0.44 <sup>§</sup> | -0.54 <sup>§</sup> |
| <i>trans</i> 18:1    | 0.16 <sup>§</sup>                    | -0.33 <sup>§</sup> | -0.49 <sup>§</sup> |
| <i>trans</i> 18:2    | 0.31 <sup>§</sup>                    | 0.25 <sup>§</sup>  | 0.02               |
| 18:2                 | -0.05                                | 0.28 <sup>§</sup>  | 0.19 <sup>§</sup>  |
| 20:4                 | 0.05                                 | 0.52 <sup>§</sup>  | 0.50 <sup>§</sup>  |
| EPA                  | -0.11 <sup>‡</sup>                   | 0.12 <sup>‡</sup>  | 0.23 <sup>§</sup>  |
| DHA                  | -0.01                                | 0.33 <sup>§</sup>  | 0.44 <sup>§</sup>  |
| <b>HPFS</b>          |                                      |                    |                    |
| 20:0                 | 1.0                                  | 0.53 <sup>§</sup>  | 0.31 <sup>§</sup>  |
| 22:0                 | 0.53 <sup>§</sup>                    | 1.0                | 0.76 <sup>§</sup>  |
| 24:0                 | 0.31 <sup>§</sup>                    | 0.76 <sup>§</sup>  | 1.0                |
| 14:0                 | -0.17 <sup>§</sup>                   | -0.39 <sup>§</sup> | -0.38 <sup>§</sup> |
| 16:0                 | -0.31 <sup>§</sup>                   | -0.64 <sup>§</sup> | -0.60 <sup>§</sup> |
| 18:0                 | 0.35 <sup>§</sup>                    | 0.01               | 0.04               |
| 15:0                 | -0.06                                | -0.13 <sup>§</sup> | -0.22 <sup>§</sup> |
| 17:0                 | 0.26 <sup>§</sup>                    | <0.01              | -0.16 <sup>§</sup> |
| <i>trans</i> 16:1n-7 | 0.14 <sup>§</sup>                    | -0.07 <sup>†</sup> | -0.23 <sup>§</sup> |
| <i>trans</i> 18:1    | 0.11 <sup>§</sup>                    | 0.06               | -0.19 <sup>§</sup> |
| <i>trans</i> 18:2    | -0.09 <sup>‡</sup>                   | -0.15 <sup>§</sup> | -0.35 <sup>§</sup> |
| 18:2                 | -0.19 <sup>‡</sup>                   | -0.09 <sup>§</sup> | -0.21 <sup>§</sup> |
| 20:4                 | 0.17 <sup>§</sup>                    | 0.43 <sup>§</sup>  | 0.39 <sup>§</sup>  |
| EPA                  | <0.01                                | -0.06              | 0.09 <sup>†</sup>  |
| DHA                  | 0.09 <sup>†</sup>                    | 0.11 <sup>§</sup>  | 0.25 <sup>§</sup>  |

<sup>1</sup>Fatty acid concentrations were assessed from the erythrocyte fraction of NHS and HPFS participants.  
<sup>†</sup>p-value for correlation coefficient < 0.05; <sup>‡</sup> p-value <0.01; <sup>§</sup> p-value <0.001.

## Supplementary data

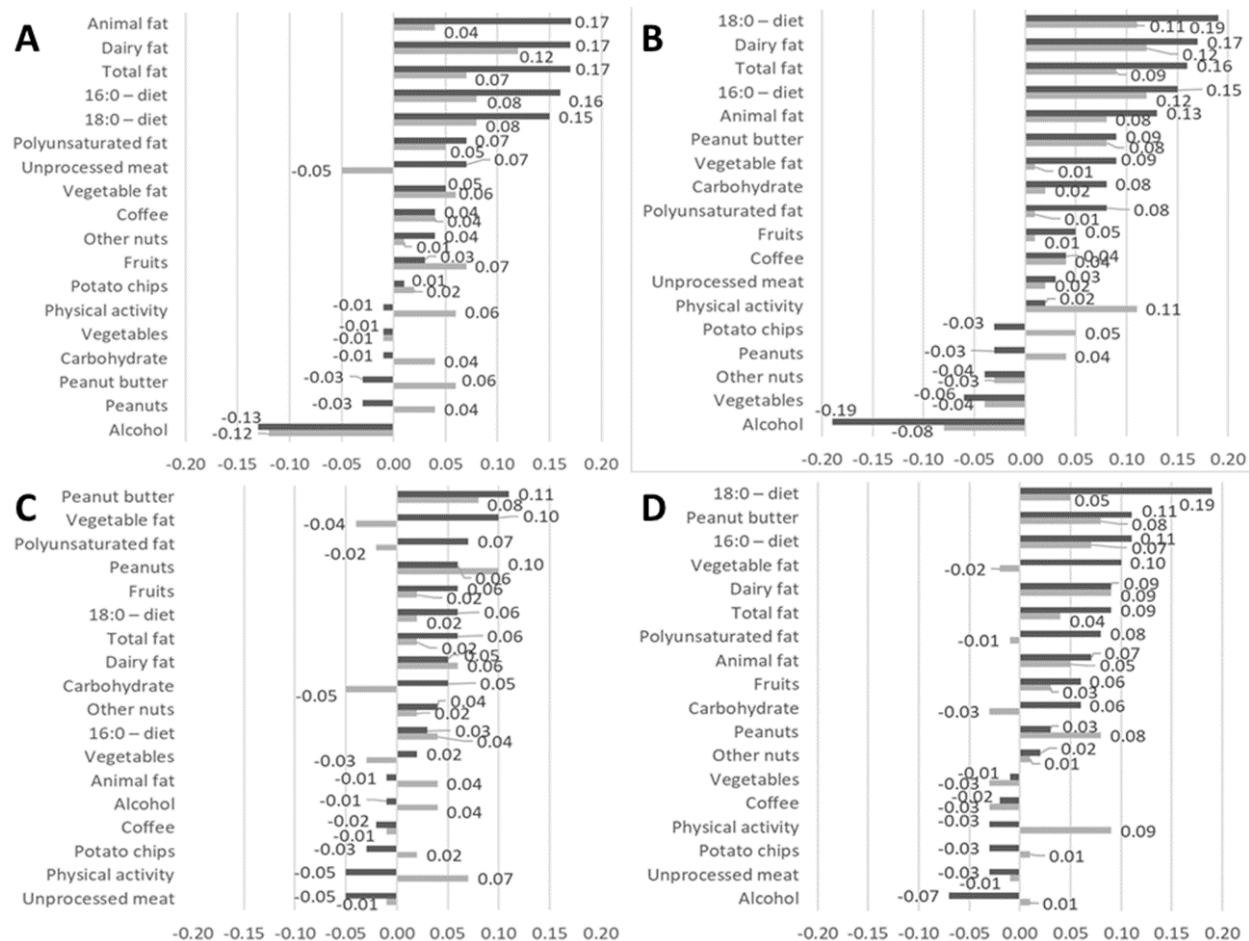

**Supplemental Figure 1. Spearman partial correlations between circulating erythrocyte fatty acid biomarkers of 20:0 (A), 22:0 (B), 24:0 (C), and sum of VLCSFAs (D) and dietary factors at baseline among 659 participants in the Nurses' Health Study and 704 participants in the Health Professionals Follow-up Study.<sup>1,2</sup>**

<sup>1</sup>Abbreviations: BMI, body mass index; HPFS, Health Professionals Follow-up Study; METs, metabolic equivalent; NHS, Nurses' Health Study.

<sup>2</sup>Correlations were adjusted for age, total energy intake, and BMI

Fatty acid concentrations were assessed from the plasma fraction of HPFS and NHS participants

Dietary and nutrient factors were assessed using the average of self-reported responses in 1990 and 1994 in the HPFS (black bars) and 1986 and 1990 in the NHS (grey bars).
